# Supplementary material for: The Chlamydia trachomatis type III-secreted effector protein CteG induces centrosome amplification through interactions with centrin-2
Source: PubMed Central journal article supplement (PMC10193975; doi:10.1073/pnas.2303487120), 2023-05-08
Supplement: pnas.2303487120.sapp.pdf [file pnas.2303487120.sapp.pdf]

## SUPPORTING INFORMATION

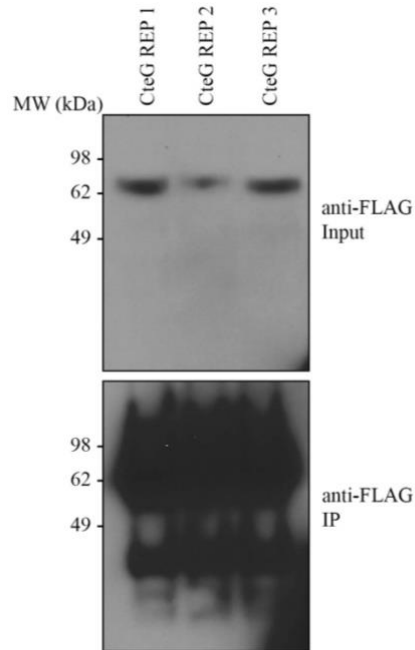

**Fig. S1.** Check of CteG-FLAG expression for AP-MS samples. IP of FLAG-tagged CteG from HeLa cells infected with *C.t.* expressing FLAG-tagged CteG. A portion of the three replicates sent for mass spectrometry.

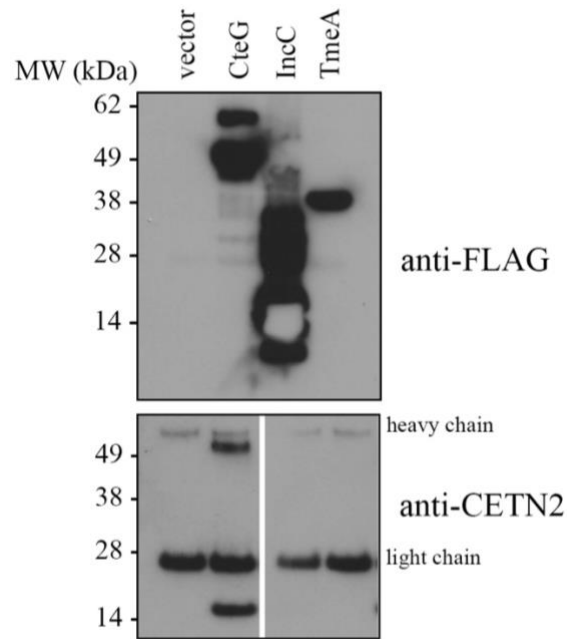

**Fig. S2.** CteG co-IPs with endogenous CETN2. Co-IP of FLAG-tagged effectors from HeLa cells infected with *C.t.* expressing the FLAG-tagged vector, CteG, IncC, or TmeA. Blot probed with antibody against CETN2 to look for endogenous interaction with *C.t.* effectors. CETN2 is ~19kDa.

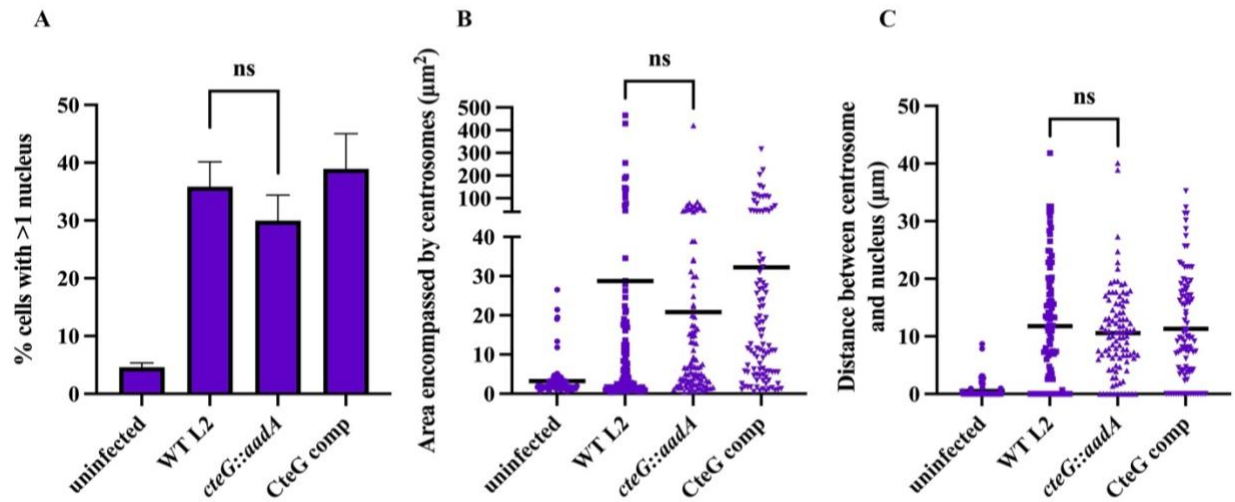

**Fig. S3.** CteG does not affect multinucleation, centrosome clustering, or centrosome distribution. (A) Quantification of cells with multinucleation (>1) at 36 hours post infection in A2EN cells represented as percent of total cells. Error bars are SD. Data are representative of 2 replicates. (B) Measurement of the area encompasses by centrosomes in A2EN cells. Black bars represent the mean. Data are representative of 100 counted cells. (C) Measurement of the distance between centrosomes to the nearest edge of the nucleus in A2EN cells. Black bars represent the mean. Data are representative of 100 counted cells. (A-C) Significance was determined using one-way ANOVA followed by Tukey's multiple comparisons test.

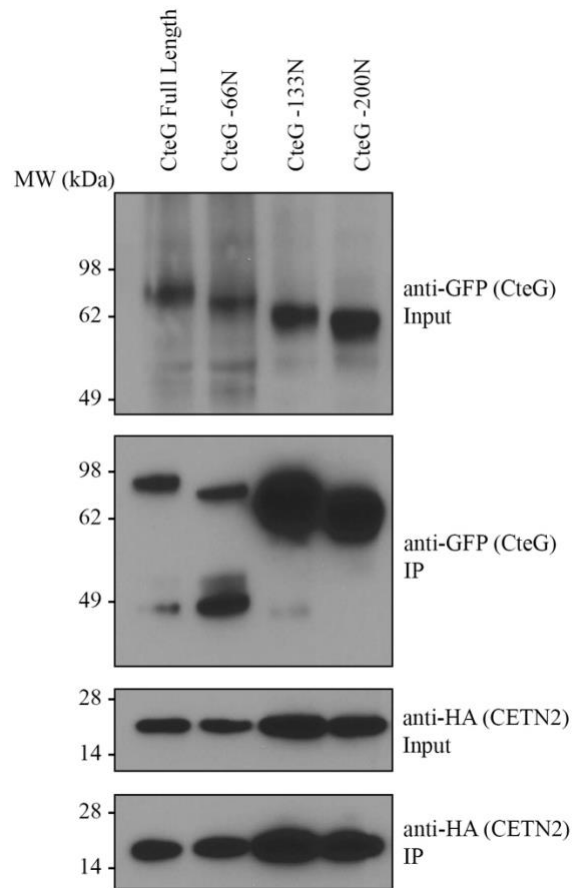

**Fig. S4.** N-terminus is dispensable for CteG interaction with CETN2. Co-IP of HA-tagged CETN2 from HeLa cells co-transfected with GFP-tagged CteG truncations and CETN2-HA.

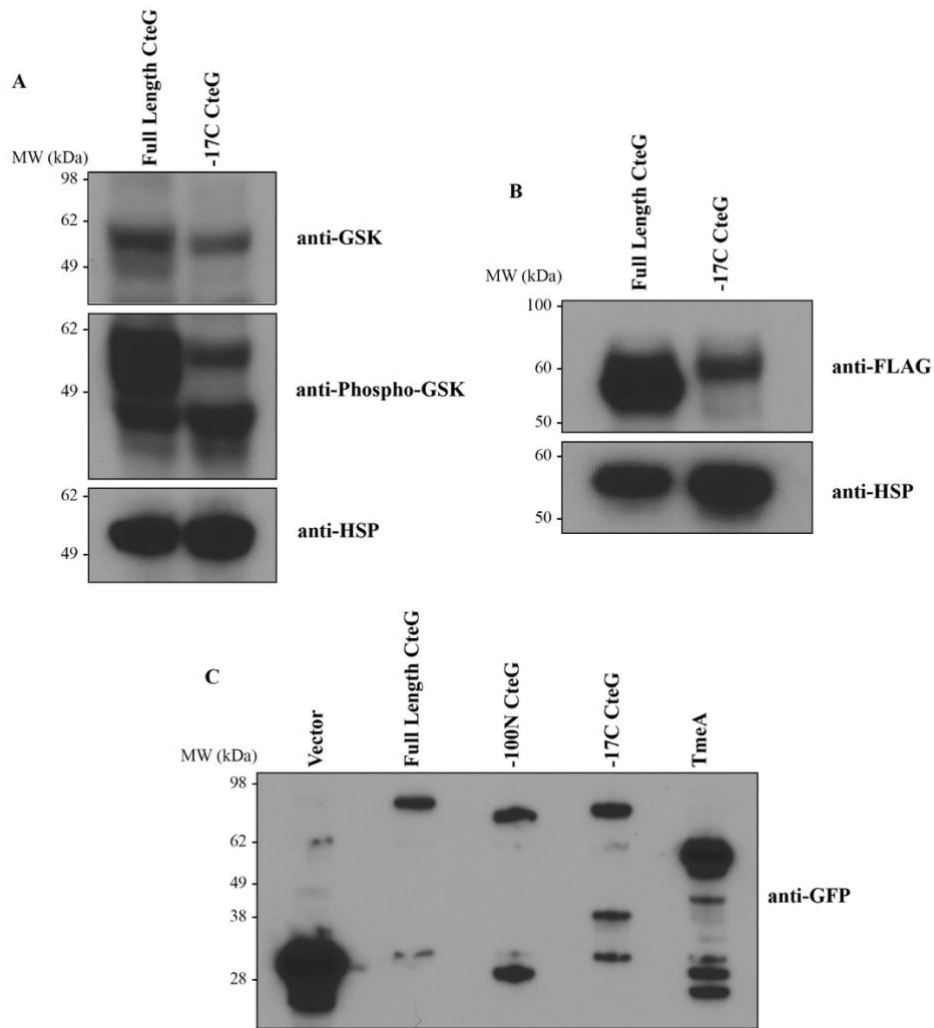

**Fig. S5.** CteG Full Length (FL) and -17C are secreted and expressed similarly in infection and by transfection. (A) Lysates from HeLa cells infected with FL or -17C GSK-tagged CteG expressing *C.t.* were probed with anti-GSK or Phospho-GSK antibodies to look at expression and secretion, respectively. Anti-HSP used as a loading control. (B) Lysates from HeLa cells infected with FL or -17C FLAG-tagged CteG expressing *C.t.* were probed with anti-FLAG to look at expression levels. Anti-HSP used as a loading control. (C) Lysates from HeLa cells transfected with GFP-tagged CteG constructs, empty vector, or TmeA. were probed with anti-GFP to assess expression levels.

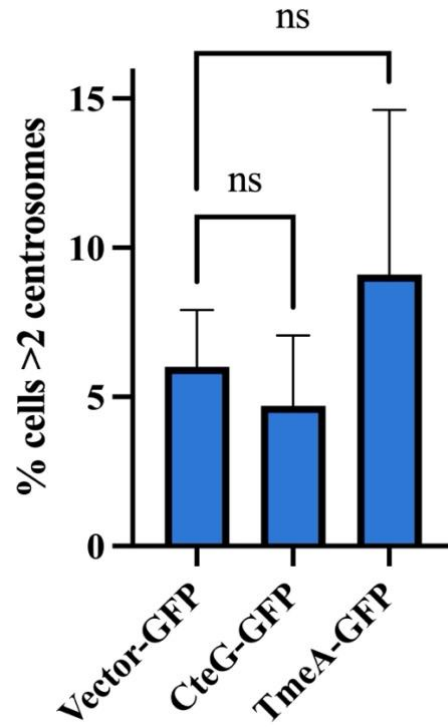

**Fig. S6.** CteG is not sufficient to induce centrosome amplification. Quantification of cells with supernumerary centrosomes (>2) at 36 hours post transfection in HeLa cells transfected with GFP-tagged empty vector, CteG, or TmeA.

**Table S1.** Primers used in this study.

| Name                | Use                                                                                    | Sequence                                                                                                                                                                                                                                                                                                                                                                                                             |
|---------------------|----------------------------------------------------------------------------------------|----------------------------------------------------------------------------------------------------------------------------------------------------------------------------------------------------------------------------------------------------------------------------------------------------------------------------------------------------------------------------------------------------------------------|
| CT144 33/34s        | TargeTron mutagenesis                                                                  | TTCCCCTCTAGAAAAAAGCTTATAATTATCCTTAA<br>CTATCGATGTTGTGCGCCAGATAGGGTGTAAAG<br>TCAAGTAGTTTAAGGTACTACTCTGTAAGATAAC<br>ACAGAAAACAGCCAACCTAACCGAAAAGCGAAA<br>GCTGATACGGGAACAGAGCACGGTTGGAAAGCG<br>ATGAGTTACCTAAAGACAATCGGGTACGACTGAG<br>TCGCAATGTTAATCAGATATAAGGTATAAGTTGT<br>GTTTACTGAACGCAAGTTTCTAATTTTCGATTATAG<br>TTCGATAGAGGAAAGTGTCTGAAACCTCTAGTAC<br>AAAGAAAGGTAAGTTAGAAACATCGACTTATCTG<br>TTATCACCACATTTGTACAATCTG |
| LtrB F              | TargeTron mutagenesis                                                                  | TTCCCCTCTAGAAAAAAGCTTATAATTATCCTTA                                                                                                                                                                                                                                                                                                                                                                                   |
| LtrB R              | TargeTron mutagenesis                                                                  | CAGATTGTACAAATGTGGTGATAACAGATAAGTC                                                                                                                                                                                                                                                                                                                                                                                   |
| pYEp13 sequencing F | Yeast suppressor screen sequencing                                                     | ACTACGCGATCATGGCGA                                                                                                                                                                                                                                                                                                                                                                                                   |
| pYEp13 sequencing R | Yeast suppressor screen sequencing                                                     | TGATGCCGGCCACGATGC                                                                                                                                                                                                                                                                                                                                                                                                   |
| APC2 HindIII F      | Yeast suppressor screen                                                                | CCAAGCTTATGTCATTTTCAGATTACCCCAAC                                                                                                                                                                                                                                                                                                                                                                                     |
| APC2 Sall R         | Yeast suppressor screen                                                                | CCGTCGACTCATGAGTTTTTATGCCCATTTT                                                                                                                                                                                                                                                                                                                                                                                      |
| CETN2 KpnI F        | CETN2 truncations                                                                      | CCGGTACCATGGCCTCCAACTTAAGAAGGC                                                                                                                                                                                                                                                                                                                                                                                       |
| CETN2 XhoI R        | CETN2 truncations                                                                      | CCCTCGAGTTAATAGAGGCTGGTCTTTTTTCAT                                                                                                                                                                                                                                                                                                                                                                                    |
| CETN2 1-133 XhoI R  | CETN2 truncations                                                                      | CCCTCGAGTTACCAACTCCTTGCCACGC                                                                                                                                                                                                                                                                                                                                                                                         |
| CETN2 1-100 XhoI R  | CETN2 truncations                                                                      | CCCTCGAGTTATTTCTCAGACATTTTCTGGGTCA                                                                                                                                                                                                                                                                                                                                                                                   |
| CETN2 1-149 XhoI R  | CETN2 truncations                                                                      | CCCTCGAGTTAAGCTTCATCAATCATTTCCTGC                                                                                                                                                                                                                                                                                                                                                                                    |
| CETN2 1-162 XhoI R  | CETN2 truncations                                                                      | CCCTCGAGTTAGAACTCTTGCTCACTGACCTCTC                                                                                                                                                                                                                                                                                                                                                                                   |
| CETN2 33-172 KpnI F | CETN2 truncations                                                                      | CCGGTACCCGGAAGCTTTTGATCTTTTCG                                                                                                                                                                                                                                                                                                                                                                                        |
| CETN2 66-172 KpnI F | CETN2 truncations                                                                      | CCGGTACCGAAGAAATTAAGAAAATGATAAG                                                                                                                                                                                                                                                                                                                                                                                      |
| CETN2 NotI F        | protein purification cloning                                                           | CCGCGCCCGCATGGCCTCCAACTTAAGAAGGC                                                                                                                                                                                                                                                                                                                                                                                     |
| CETN2 Sall R        | protein purification cloning                                                           | CCGTCGACATAGAGGCTGGTCTTTTTTC                                                                                                                                                                                                                                                                                                                                                                                         |
| CteG +1 KpnI F      | Yeast suppressor screen                                                                | CCGGTACCAATGTCATTTGGTATTGGTAGTGCTT                                                                                                                                                                                                                                                                                                                                                                                   |
| CteG XbaI R         | Yeast suppressor screen/Ectopic expression                                             | CCTCTAGACTAGATAGAGGAGCTTTGCACAC                                                                                                                                                                                                                                                                                                                                                                                      |
| CteG KpnI F         | Ectopic Expression                                                                     | CCGGTACCATGTCATTTGGTATTGGTAGTGCT                                                                                                                                                                                                                                                                                                                                                                                     |
| CteG NotI F         | CteG truncations/<br>pBomb4 plasmid cloning, GSK cloning, protein purification cloning | CCGCGCCCGCATGTCATTTGGTATTGGTAGTGCTT                                                                                                                                                                                                                                                                                                                                                                                  |

|                       |                                                |                                                                     |
|-----------------------|------------------------------------------------|---------------------------------------------------------------------|
| CteG FLAG KpnI R      | CteG truncations,<br>GSK cloning               | CCGGTACCTTACTTATCGTCGTCATCCTTGTAAATC<br>GATAGAGGAGCTTTGCACACCT      |
| CteG FLAG Sall R      | CteG truncations/<br>pBomb4 plasmid<br>cloning | CCGTCGACTTACTTATCGTCGTCATCCTTGTAAATC<br>GATAGAGGAGCTTTGCACACCT      |
| CteG Sall R           | protein purification<br>cloning                | CCGTCGACCTAGATAGAGGAGCTTTGCACA                                      |
| CteG -100N KpnI F     | CteG truncations                               | CCGGTACCGGAGTAAGTCTTACATCTATATC                                     |
| CteG -66N KpnI F      | CteG truncations                               | CCGGTACCCCAATGGTAGGGACGTACTIONCAG                                   |
| CteG -133N KpnI F     | CteG truncations                               | CCGGTACCTCTGCAAGAGGTGCTGGTTCC                                       |
| CteG -200N KpnI F     | CteG truncations                               | CCGGTACCTTTCTTGCTTTAGGAGGAT                                         |
| CteG -66C XbaI R      | CteG truncations                               | CCTCTAGAGGATGATTGCAAATGCGTTAAAC                                     |
| CteG -133C XbaI R     | CteG truncations                               | CCTCTAGACTTACAAAGAAGCATGGTCAACT                                     |
| CteG -200C XbaI R     | CteG truncations                               | CCTCTAGAACCGCCTGCTAATCCGCTG                                         |
| CteG -17C FLAG Sall R | pBomb4 plasmid<br>cloning                      | CCGTCGACTTACTTATCGTCGTCATCCTTGTAAATC<br>TTCTCTCATAAGATCTTTACTTT     |
| CteG -33C FLAG Sall R | pBomb4 plasmid<br>cloning                      | CCGTCGACTTACTTATCGTCGTCATCCTTGTAAATC<br>CTCTAATAGGGATAGGAAAGAAC     |
| CteG -50C FLAG Sall R | pBomb4 plasmid<br>cloning                      | CCGTCGACTTACTTATCGTCGTCATCCTTGTAAATC<br>ACGCACTTCTGCTCGAGTTCTGT     |
| TmeA KpnI F           | Ectopic expression                             | CCGGTACCATGAGTATTTCGACCTACTAATGGGAG                                 |
| TmeA NotI R           | Ectopic expression                             | CCGCGGCCGCGTCTAAGAAAACAGAAGAAGTT                                    |
| TmeA KpnI +1 F        | Yeast suppressor<br>screen                     | CCGGTACCAATGAGTATTTCGACCTACTAATGGGA<br>G                            |
| TmeA XbaI R           | Yeast suppressor<br>screen                     | CCTCTAGATTAGTCTAAGAAAACAGAAGAAGTTA<br>TGAC                          |
| TmeA Not F            | pBomb4 plasmid<br>cloning                      | CCGCGGCCGCGATGAGTATTTCGACCTACTAATGGG<br>AG                          |
| TmeA Flag Sall R      | pBomb4 plasmid<br>cloning                      | CCGTCGACTTACTTATCGTCGTCATCCTTGTAAATC<br>GTCTAAGAAAACAGAAGAAGTTATGAC |
| IncC NotI F           | pBomb4 plasmid<br>cloning                      | CCGCGGCCGCGATGACGTACTIONCTATGTCCGATA                                |
| IncC FLAG Sall R      | pBomb4 plasmid<br>cloning                      | CCGTCGACTTACTTATCGTCGTCATCCTTGTAAATC<br>GCTTACATATAAAGTTTGAGGAT     |
| CpoS Sall F           | protein purification<br>cloning                | GACGCGTCGACCTTGCTAGAGCACGAAGTCGT                                    |
| CpoS NotI R           | protein purification<br>cloning                | GACGCGCGGCCGCTTTTTTACGACGGGATGCCTG                                  |



**Table S2.** Complete list of filtered AP-MS peptides for CteG.

| Protein Description                                         | Accession  | Database                      | Avg. Score | Mass   | Avg. Num. of Sig. Matches | Avg. Num. of Sig. Sequences |
|-------------------------------------------------------------|------------|-------------------------------|------------|--------|---------------------------|-----------------------------|
| Actin, cytoplasmic 2                                        | P63261     | UniProt_Human                 | 2445       | 41766  | 77                        | 20                          |
| Type III secretion system protein                           | A0A654L4P8 | Chlamydia_trachomatis_L2434Bu | 1049       | 41172  | 28                        | 15                          |
| Centrin-2                                                   | P41208     | UniProt_Human                 | 844        | 19726  | 21                        | 9                           |
| Putative RNA-binding protein Luc7-like 2                    | Q9Y383     | UniProt_Human                 | 681        | 46486  | 20                        | 10                          |
| Filamin-A                                                   | Q60FE5     | UniProt_Human                 | 493        | 278053 | 20                        | 16                          |
| Tropomodulin-3                                              | Q9NYL9     | UniProt_Human                 | 428        | 39570  | 13                        | 10                          |
| Uncharacterized <i>C.t.</i> protein                         | A0A654L6L6 | Chlamydia_trachomatis_L2434Bu | 425        | 68204  | 11                        | 7                           |
| Peptidyl-prolyl cis-trans isomerase B                       | P23284     | UniProt_Human                 | 312        | 23728  | 11                        | 8                           |
| Girdin                                                      | A0A2R8Y7B1 | UniProt_Human                 | 243        | 185366 | 9                         | 7                           |
| Cleavage and polyadenylation specificity factor subunit 6   | F8WJN3     | UniProt_Human                 | 456        | 52238  | 7                         | 4                           |
| Activated RNA polymerase II transcriptional coactivator p15 | P53999     | UniProt_Human                 | 173        | 14386  | 7                         | 6                           |
| ATP synthase subunit alpha, mitochondrial (Fragment)        | K7EK77     | UniProt_Human                 | 131        | 22186  | 6                         | 6                           |
| 4F2 cell-surface antigen heavy chain                        | J3KPF3     | UniProt_Human                 | 186        | 68059  | 5                         | 4                           |
| Transaldolase                                               | A0A654L6E7 | Chlamydia_trachomatis_L2434Bu | 252        | 36138  | 5                         | 4                           |
| 60S acidic ribosomal protein P2                             | P05387     | UniProt_Human                 | 141        | 11658  | 4                         | 4                           |
| Molecular chaperone DnaK                                    | A0A654L6Q8 | Chlamydia_trachomatis_L2434Bu | 147        | 70800  | 4                         | 4                           |
| FACT complex subunit SPT16                                  | Q9Y5B9     | UniProt_Human                 | 88         | 119838 | 4                         | 4                           |
| Keratin, type I cytoskeletal 9                              | P35527     | UniProt_Human                 | 252        | 62027  | 4                         | 4                           |

|                                                              |            |                               |     |        |   |   |
|--------------------------------------------------------------|------------|-------------------------------|-----|--------|---|---|
| Signal recognition particle receptor subunit beta (Fragment) | H7C4H2     | UniProt_Human                 | 157 | 17602  | 4 | 4 |
| Peptidyl-prolyl cis-trans isomerase A                        | P62937     | UniProt_Human                 | 110 | 18001  | 4 | 3 |
| Importin-9                                                   | Q96P70     | UniProt_Human                 | 91  | 115889 | 4 | 2 |
| Protein disulfide-isomerase A3                               | P30101     | UniProt_Human                 | 102 | 56747  | 4 | 4 |
| Ribosomal protein L19                                        | J3KTE4     | UniProt_Human                 | 154 | 23233  | 4 | 3 |
| 60S ribosomal protein L7a (Fragment)                         | Q5T8U3     | UniProt_Human                 | 92  | 21531  | 3 | 3 |
| 60 kDa chaperonin                                            | A0A654L5L1 | Chlamydia_trachomatis_L2434Bu | 62  | 58054  | 3 | 3 |
| 60S ribosomal protein L23a (Fragment)                        | H7BY10     | UniProt_Human                 | 86  | 17792  | 3 | 2 |
| 60S ribosomal protein L13                                    | P26373     | UniProt_Human                 | 81  | 24247  | 3 | 3 |
| Calmodulin-1                                                 | P0DP23     | UniProt_Human                 | 143 | 16827  | 3 | 3 |
| 40S ribosomal protein S6                                     | A2A3R5     | UniProt_Human                 | 85  | 24953  | 3 | 3 |
| Cofilin, non-muscle isoform (Fragment)                       | E9PP50     | UniProt_Human                 | 102 | 17766  | 3 | 3 |
| Peptidyl-prolyl cis-trans isomerase-like 4                   | Q8WUA2     | UniProt_Human                 | 59  | 57189  | 3 | 2 |
| Putative RNA-binding protein Luc7-like 1                     | Q9NQ29     | UniProt_Human                 | 122 | 43701  | 3 | 2 |
| 50S ribosomal protein L16                                    | A0A654L7G0 | Chlamydia_trachomatis_L2434Bu | 134 | 15765  | 3 | 3 |
| Adenosylmethionine decarboxylase                             | A0A5F9ZHD5 | UniProt_Human                 | 111 | 53138  | 3 | 3 |
| Molecular chaperone GrpE                                     | A0A654L6N2 | Chlamydia_trachomatis_L2434Bu | 87  | 21655  | 3 | 2 |
| Mediator of RNA polymerase II transcription subunit 1        | Q15648     | UniProt_Human                 | 181 | 168373 | 3 | 2 |
| Spectrin beta chain                                          | A0A087WUZ3 | UniProt_Human                 | 75  | 274659 | 3 | 2 |
| Molecular chaperone DnaJ                                     | A0A654L6M8 | Chlamydia_trachomatis_L2434Bu | 93  | 41890  | 3 | 3 |
| Heat shock 70 kDa protein 1B                                 | A0A0G2JIW1 | UniProt_Human                 | 89  | 70066  | 3 | 3 |
| 60S ribosomal protein L28                                    | H0YKD8     | UniProt_Human                 | 57  | 19060  | 3 | 2 |

|                                                                |            |                               |     |       |   |   |
|----------------------------------------------------------------|------------|-------------------------------|-----|-------|---|---|
| Importin subunit beta-1 (Fragment)                             | J3QR48     | UniProt_Human                 | 78  | 16388 | 2 | 2 |
| S-adenosylmethionine synthase isoform type-2                   | P31153     | UniProt_Human                 | 129 | 43633 | 2 | 2 |
| HLA class I histocompatibility antigen, A alpha chain          | A0A0G2JPD3 | UniProt_Human                 | 97  | 44397 | 2 | 2 |
| Dihydropteroate synthase                                       | A0A654L9I1 | Chlamydia_trachomatis_L2434Bu | 80  | 50230 | 2 | 2 |
| Centrin-3                                                      | E5RJF8     | UniProt_Human                 | 59  | 22409 | 2 | 2 |
| ATP synthase subunit d, mitochondrial                          | F5H608     | UniProt_Human                 | 55  | 8910  | 2 | 2 |
| 30S ribosomal protein S10                                      | A0A654L6R0 | Chlamydia_trachomatis_L2434Bu | 61  | 11862 | 2 | 2 |
| Pre-mRNA-splicing factor 38A                                   | Q8NAV1     | UniProt_Human                 | 44  | 37453 | 2 | 2 |
| 50S ribosomal protein L21                                      | A0A654L7I1 | Chlamydia_trachomatis_L2434Bu | 62  | 12155 | 2 | 2 |
| Membrane protein                                               | A0A654LGL6 | Chlamydia_trachomatis_L2434Bu | 98  | 17529 | 2 | 1 |
| Catenin (Cadherin-associated protein), alpha 1, isoform CRA_a  | G3XAM7     | UniProt_Human                 | 125 | 92663 | 2 | 2 |
| Albumin                                                        | A0A087WWT3 | UniProt_Human                 | 94  | 45118 | 2 | 1 |
| Dehydrogenase                                                  | A0A654L7A9 | Chlamydia_trachomatis_L2434Bu | 73  | 26816 | 2 | 2 |
| Histone H1.2                                                   | P16403     | UniProt_Human                 | 75  | 21352 | 2 | 2 |
| FACT complex subunit SSRP1                                     | Q08945     | UniProt_Human                 | 69  | 81024 | 2 | 2 |
| 50S ribosomal protein L17                                      | A0A654L6Q2 | Chlamydia_trachomatis_L2434Bu | 59  | 16142 | 2 | 2 |
| Spindlin interactor and repressor of chromatin-binding protein | Q9BUA3     | UniProt_Human                 | 73  | 41011 | 2 | 2 |
| 60 kDa heat shock protein, mitochondrial                       | P10809     | UniProt_Human                 | 39  | 61016 | 2 | 2 |
| 50S ribosomal protein L13                                      | A0A654L5X5 | Chlamydia_trachomatis_L2434Bu | 54  | 16839 | 2 | 2 |

|                                                             |            |                               |     |        |   |   |
|-------------------------------------------------------------|------------|-------------------------------|-----|--------|---|---|
| Membrane-associated progesterone receptor component 1       | O00264     | UniProt_Human                 | 68  | 21658  | 2 | 2 |
| 30S ribosomal protein S9                                    | A0A654L6N5 | Chlamydia_trachomatis_L2434Bu | 56  | 14533  | 2 | 2 |
| Vimentin                                                    | P08670     | UniProt_Human                 | 58  | 53619  | 2 | 2 |
| Calcium homeostasis endoplasmic reticulum protein           | J3QK89     | UniProt_Human                 | 61  | 104868 | 2 | 1 |
| 60S ribosomal protein L21                                   | P46778     | UniProt_Human                 | 34  | 18553  | 2 | 2 |
| 60S ribosomal protein L26                                   | J3KSS0     | UniProt_Human                 | 31  | 7570   | 2 | 1 |
| Pre-mRNA 3'-end-processing factor FIP1 (Fragment)           | H0Y8P7     | UniProt_Human                 | 116 | 29476  | 2 | 2 |
| Brain acid soluble protein 1                                | P80723     | UniProt_Human                 | 99  | 22680  | 2 | 2 |
| Serine/threonine-protein phosphatase 6 regulatory subunit 1 | Q9UPN7     | UniProt_Human                 | 107 | 96664  | 2 | 2 |
| Ras-related protein Rab-5C                                  | P51148     | UniProt_Human                 | 89  | 23468  | 2 | 1 |
| Preproteins translocase J                                   | A0A654L770 | Chlamydia_trachomatis_L2434Bu | 73  | 35489  | 2 | 1 |
| 60S ribosomal protein L34                                   | P49207     | UniProt_Human                 | 44  | 13284  | 2 | 1 |
| 40S ribosomal protein S12                                   | P25398     | UniProt_Human                 | 105 | 14505  | 2 | 1 |
| 60S ribosomal protein L5 (Fragment)                         | A0A2R8Y6J3 | UniProt_Human                 | 42  | 27028  | 2 | 2 |
| eIF-2-alpha kinase activator GCN1                           | Q92616     | UniProt_Human                 | 41  | 292572 | 2 | 2 |
| Uncharacterized <i>C.t.</i> protein                         | A0A654LIJ4 | Chlamydia_trachomatis_L2434Bu | 52  | 32014  | 2 | 2 |
| Importin-8                                                  | F5H815     | UniProt_Human                 | 26  | 3990   | 2 | 2 |
